# Supplementary material for: ROS-responsive dexamethasone micelles normalize the tumor microenvironment enhancing hypericin in cancer photodynamic therapy
Source: Royal Society of Chemistry journal article supplement (doi:10.1039/d1bm01802g), 2021-12-24
Supplement: d1bm01802g1.pdf [file d1bm01802g1.pdf]

## Supporting Information

**Table S1 Orthogonal experiment of HDTM micelles.**

| Test                       | A      | B      | C      | D      | Size (nm)                                | EE of HYP | EE of DXM |
|----------------------------|--------|--------|--------|--------|------------------------------------------|-----------|-----------|
| 1                          | 2.50%  | 20%    | 0.5    | 1 : 4  | 91.72                                    | 1         | 0.4       |
| 2                          | 2.50%  | 30%    | 1      | 1 : 8  | 144.77                                   | 1         | 0.41      |
| 3                          | 2.50%  | 40%    | 1.5    | 1 : 10 | 172.67                                   | 1         | 0.53      |
| 4                          | 5.00%  | 20%    | 1      | 1 : 10 | 501                                      | 0.97      | 0.43      |
| 5                          | 5.00%  | 30%    | 1.5    | 1 : 4  | 272.9                                    | 0.98      | 0.46      |
| 6                          | 5.00%  | 40%    | 0.5    | 1 : 8  | 254.23                                   | 1         | 0.36      |
| 7                          | 7.50%  | 20%    | 1.5    | 1 : 8  | 155                                      | 1         | 0.5       |
| 8                          | 7.50%  | 30%    | 0.5    | 1 : 10 | 579.9                                    | 1         | 0.39      |
| 9                          | 7.50%  | 40%    | 1      | 1 : 4  | 123.07                                   | 0.83      | 0.38      |
| -----                      |        |        |        |        |                                          |           |           |
| <b>Size</b>                |        |        |        |        |                                          |           |           |
| K1                         | 136.38 | 249.24 | 308.62 | 162.56 | <b>Optimization levels</b>               |           |           |
| K2                         | 342.71 | 332.52 | 256.28 | 184.67 | <b>DABC</b>                              |           |           |
| K3                         | 285.99 | 183.32 | 200.19 | 417.85 | <b>Optimal formulation for size</b>      |           |           |
| R                          | 206.33 | 149.2  | 108.43 | 255.29 | <b>D1 A1 B3 C3</b>                       |           |           |
| -----                      |        |        |        |        |                                          |           |           |
| <b>EE of HYP</b>           |        |        |        |        |                                          |           |           |
| T1                         | 1      | 0.991  | 1      | 0.94   | <b>Optimization levels</b>               |           |           |
| T2                         | 0.986  | 0.995  | 0.936  | 1      | <b>CDAB</b>                              |           |           |
| T3                         | 0.945  | 0.945  | 0.995  | 0.991  | <b>Optimal formulation for EE of HYP</b> |           |           |
| R                          | 0.055  | 0.05   | 0.064  | 0.06   | <b>C1 D2 A1 B2</b>                       |           |           |
| -----                      |        |        |        |        |                                          |           |           |
| <b>EE of DXM</b>           |        |        |        |        |                                          |           |           |
| Z1                         | 0.447  | 0.443  | 0.383  | 0.41   | <b>Optimization levels</b>               |           |           |
| Z2                         | 0.417  | 0.42   | 0.407  | 0.427  | <b>CDAB</b>                              |           |           |
| Z3                         | 0.423  | 0.423  | 0.5    | 0.45   | <b>Optimal formulation for EE of DXM</b> |           |           |
| R                          | 0.03   | 0.023  | 0.117  | 0.04   | <b>C3 D3 A1 B1</b>                       |           |           |
| =====                      |        |        |        |        |                                          |           |           |
| <b>Optimal combination</b> |        |        |        |        |                                          |           |           |
| <b>A1 B3 C3 D1</b>         |        |        |        |        |                                          |           |           |

**Note:** A, HYP (%); B, Ultrasonic power (w); C, F68 concentration (%); D, Oil / Water (v/v)

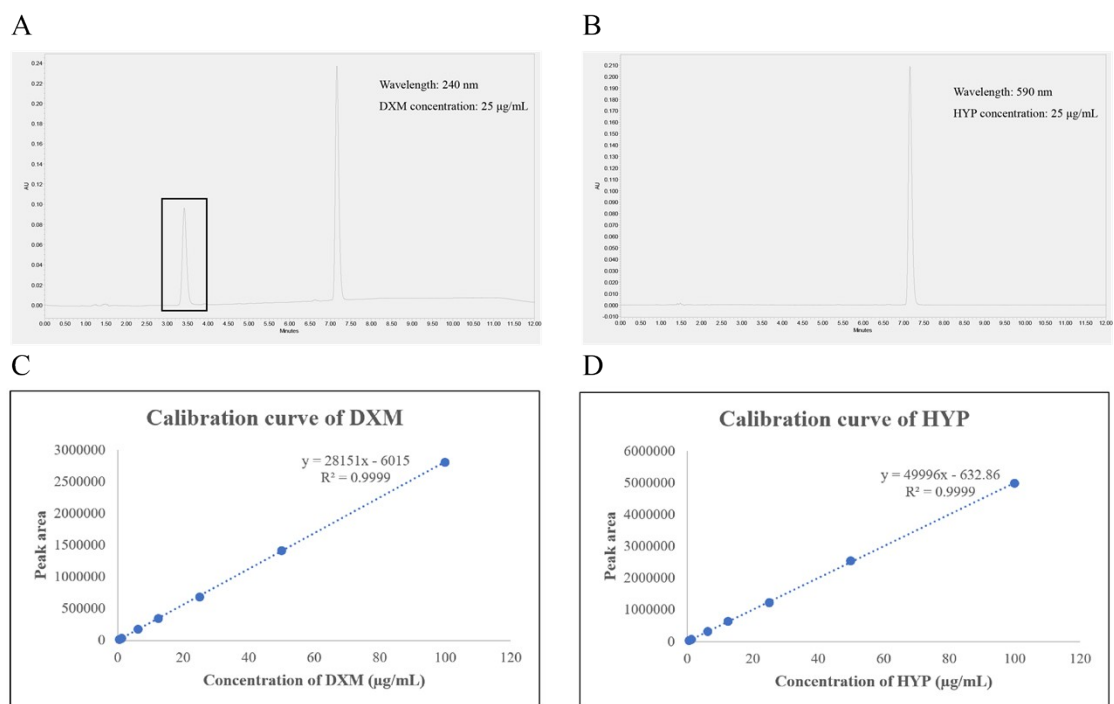

**Fig. S1 Chromatogram and Calibration Curves of HYP and DXM. (A)** Chromatographic peak of DXM and **(B)** chromatographic peak of HYP. **(C)** Calibration curves of DXM and **(D)** HYP.

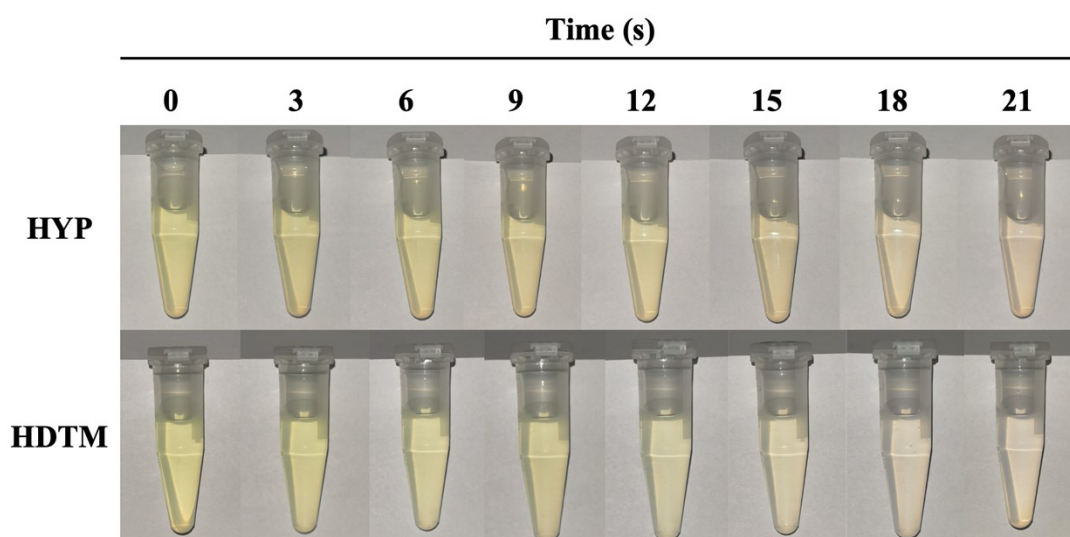

**Fig. S2 The fading process after DPBF reacts with ROS produced by HYP.**

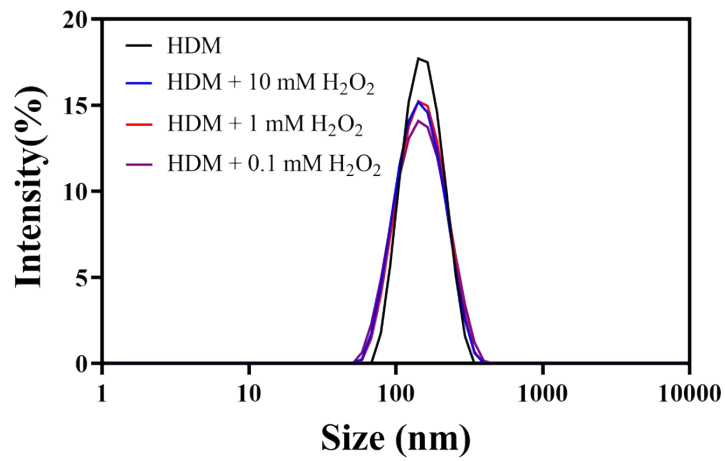

Fig. S3 Particle size changes of the HDM in response to various ROS conditions.

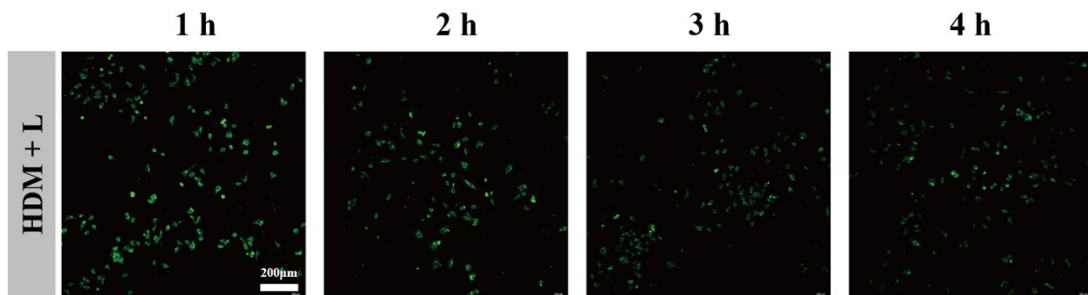

Fig. S4 Fluorescence analysis of intracellular ROS produced by HDM in 4T1 cells.

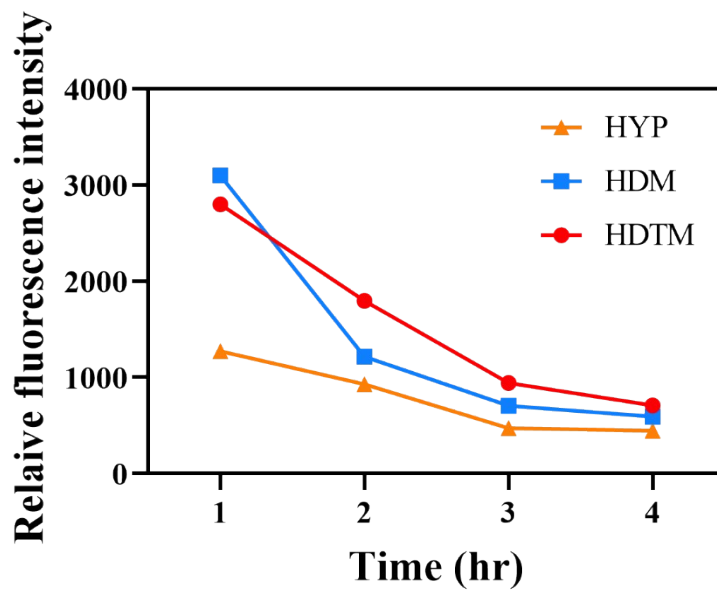

Fig. S5 Quantitative analysis of intracellular ROS produced by HYP formulations in 4T1 cells.

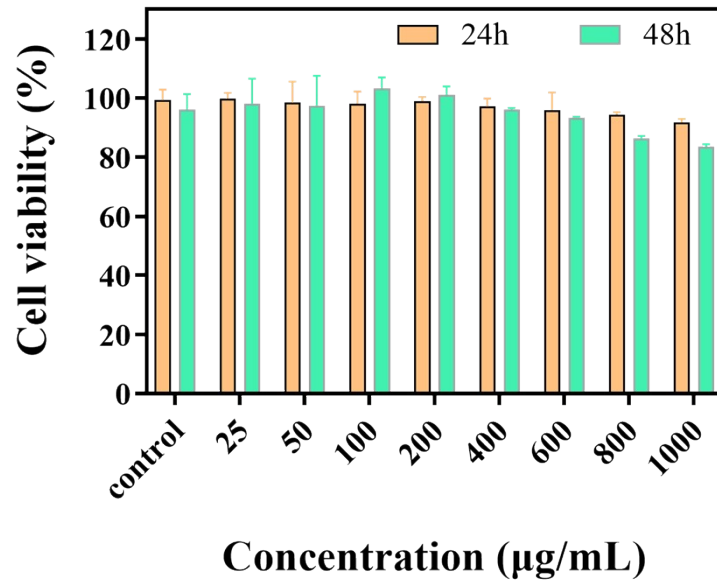

Fig. S6 The cytotoxicity of polymer PLGA<sub>10k</sub>-TK-PEG<sub>2k</sub> in 4T1 cells determined by MTT assay (n=3).

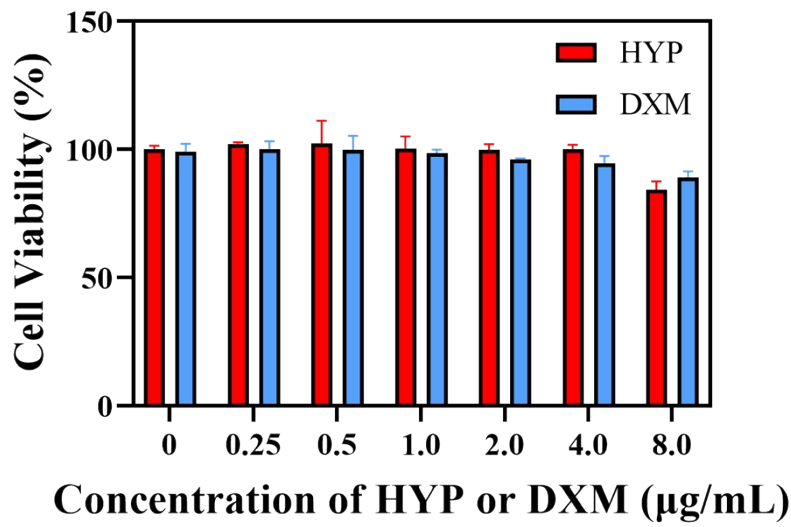

Fig. S7 The cytotoxicity of HYP and DXM in 4T1 cells determined by MTT assay (n=3).

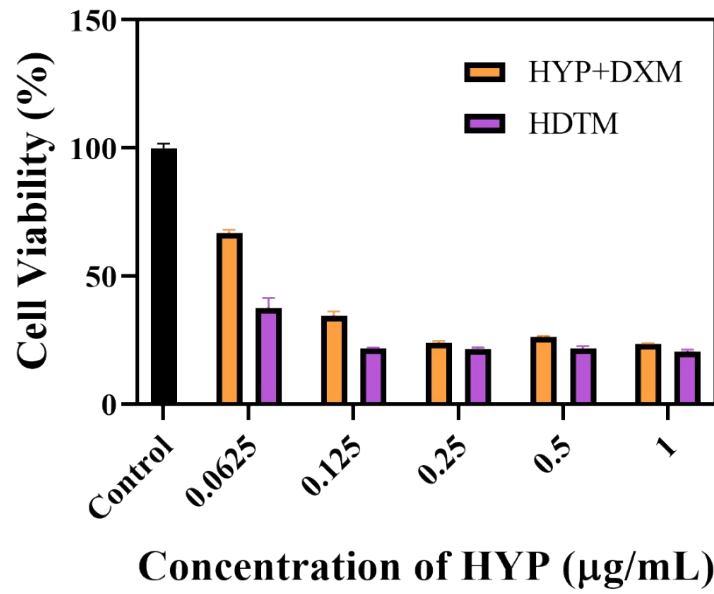

Fig. S8 Phototoxicity of HYP formulations in B16 cells determined by MTT assay (n=3).

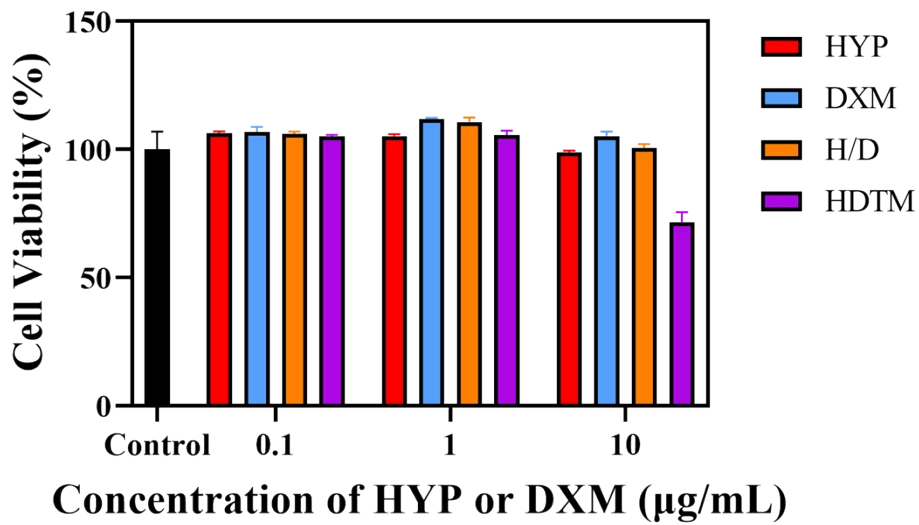

Fig. S9 Cytotoxicity of DXM and HYP formulations in HUVEC cells determined by MTT assay (n=3).
